# Supplementary material for: A Coating Based on Bioactive Compounds from Streptomyces spp. and Chitosan Oligomers to Control Botrytis cinerea Preserves the Quality and Improves the Shelf Life of Table Grapes
Source: MDPI journal article supplement (doi:10.3390/plants12030577), 2023-01-28
Supplement: s1 [file s1]

# A Coating based on Bioactive Compounds from *Streptomyces* spp. and Chitosan Oligomers to Control *Botrytis cinerea*, Preserve the Quality and Improve the Shelf Life of Table Grapes

Laura Buzón-Durán, Eva Sánchez-Hernández, Mercedes Sánchez-Báscones,  
Mari Cruz García-González, Salvador Hernández-Navarro, Adriana Correa-Guimarães and  
Pablo Martín-Ramos

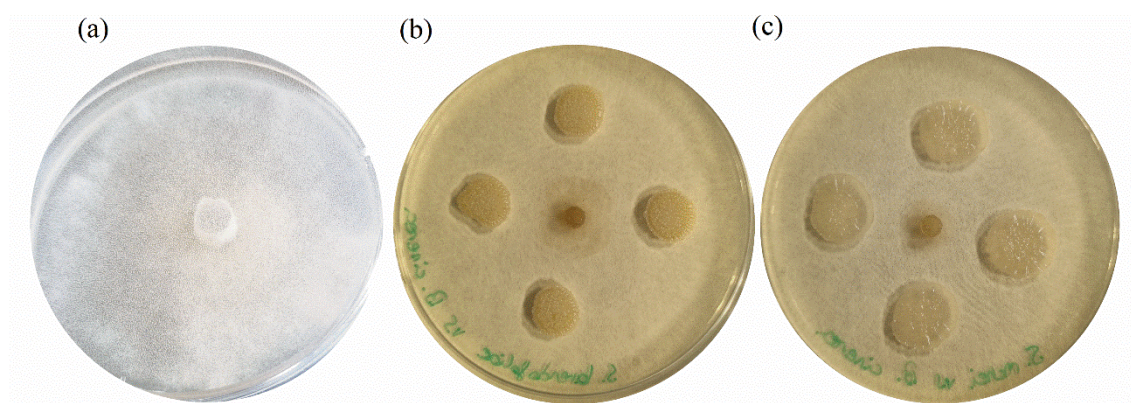

**Figure S1.** Antagonism of *Streptomyces* spp. against *B. cinerea* in dual plate assays: (a) PDA control; (b) *S. lavendofoliae* DSM 40217 versus *B. cinerea*; (c) *S. rochei* DSM 41729 versus *B. cinerea*. Only one replicate per treatment is shown.

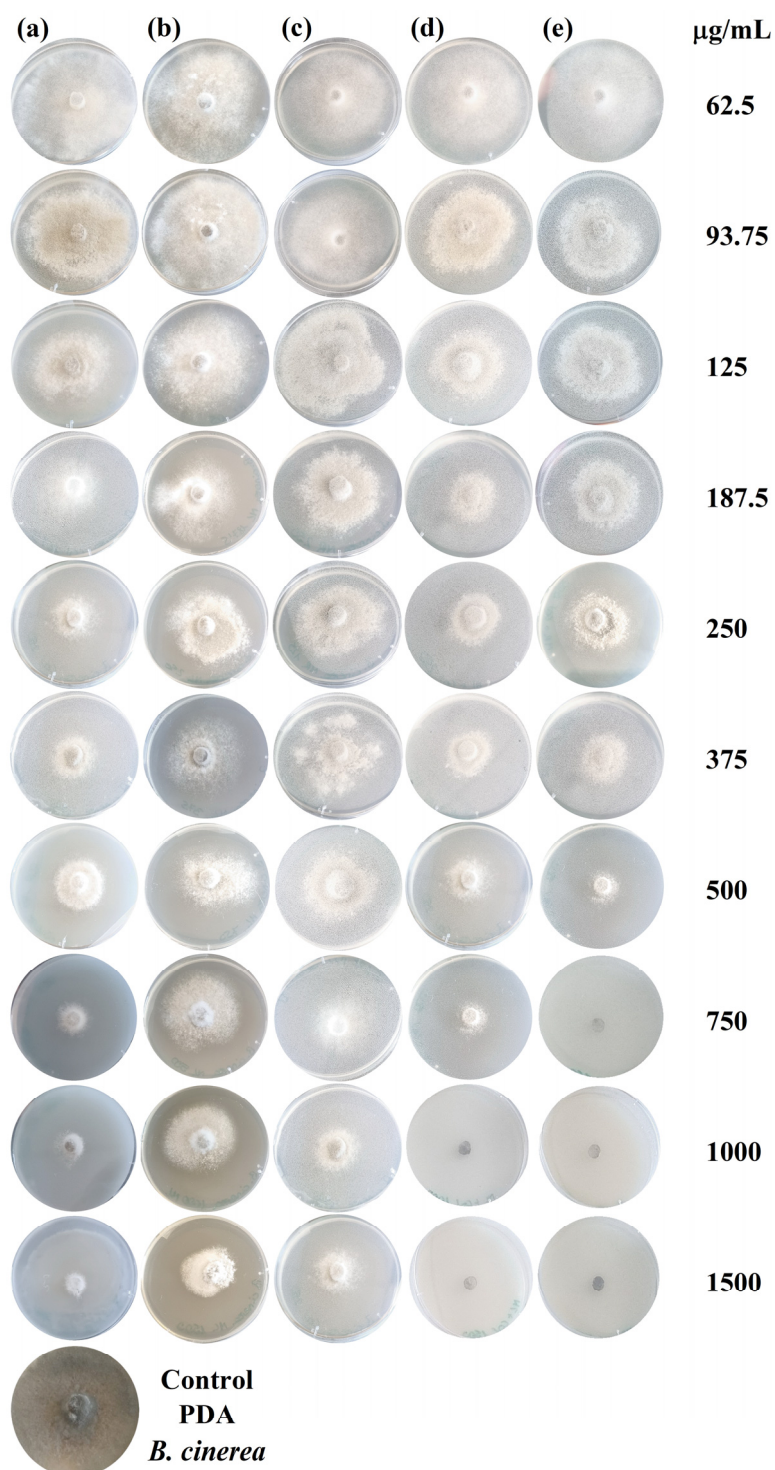

**Figure S2.** Results of *B. cinerea* mycelial growth inhibition assays: (a) chitosan oligomers; (b) *S. lavendofoliae* DSM 40217 secondary metabolites; (c) *S. rochei* DSM 41729 secondary metabolites; (d) COS-*S. lavendofoliae* DSM 40217 secondary metabolites; (e) COS-*S. rochei* DSM 41729 secondary metabolites. The concentration of the treatments decreases from top to bottom. The Petri dish in the bottom left corner shows the PDA control. Only one replicate per treatment and dose is shown.

**Table S1.** Chemical species identified by GC-MS in *S. lavendofoliae* DSM 40217 extract.

| RT<br>(min) | Area<br>(%) | Assignment                                                                            |
|-------------|-------------|---------------------------------------------------------------------------------------|
| 3.3600      | 0.125       | Butanoic acid, 3-hydroxy-, ethyl ester                                                |
| 3.4371      | 0.236       | Butanamide, 3-methyl-                                                                 |
| 3.5202      | 0.110       | 1,2-Propanediol, 3-methoxy-                                                           |
| 4.3512      | 0.163       | Methional                                                                             |
| 4.4580      | 0.144       | Pyrazine, 2,5-dimethyl-                                                               |
| 4.5233      | 0.139       | 1,2,4-Cyclopentanetrione, 3,3-dimethyl-                                               |
| 4.9091      | 0.425       | Butyrolactone                                                                         |
| 4.9625      | 0.661       | 1,4-Dioxaspiro[2.4]heptan-5-one, 7-methyl-                                            |
| 5.0278      | 0.556       | 1,2-Cyclopentanedione                                                                 |
| 5.2711      | 0.451       | 2-Methylpyrazolo[3,4-d]tetrazolo[4,5-b]pyrimidin-4(2H)-one                            |
| 5.7697      | 1.590       | 3(5)-[[1,2-Dihydroxy-3-propoxy)methyl]-4-hydroxy-1H-pyrazole-5(3)-carboxamide         |
| 5.9062      | 3.438       | Borane, compd. with dimethylamine (1:1)                                               |
| 6.0546      | 1.359       | N,N-Dimethylglycine                                                                   |
| 6.1496      | 0.516       | Piperazine, 2,5-dimethyl-, trans-                                                     |
| 6.1970      | 0.250       | Tetramethylammonium perchlorate                                                       |
| 6.2445      | 0.990       | N,N-Dimethylglycine                                                                   |
| 6.4285      | 1.341       | Benzeneacetaldehyde                                                                   |
| 6.4938      | 3.962       | Benzeneacetaldehyde                                                                   |
| 6.6837      | 0.689       | 1H-Pyrazole, 3-methyl-                                                                |
| 6.8084      | 0.314       | 9-Azabicyclo[6.1.0]non-4-en-9-amine, (1.alpha.,4Z,8.alpha.)-                          |
| 6.8499      | 0.542       | N-Methyl-N-(N,N-dimethylaminoethyl)-aminoethanol                                      |
| 6.9924      | 0.662       | 2-Pyrrolidinone                                                                       |
| 7.0814      | 0.331       | 3,7-Dihydropurine-2,6-dione, 7-(2-dimethylaminoethyl)-3-methyl-                       |
| 7.2832      | 0.445       | N,N',N''-Trimethyldiitrimethylenetriamine                                             |
| 7.3248      | 0.298       | 2,5-Dihydro-5-methoxy-2-furanone                                                      |
| 7.4078      | 0.823       | 1,3-Propanediamine, N-methyl-                                                         |
| 7.5088      | 0.267       | 5,6-Diamino-1,3-dimethyluracil                                                        |
| 7.5622      | 0.210       | 3-Piperidinol, 1,4-dimethyl-, trans-                                                  |
| 7.6749      | 0.242       | 4,5-Diamino-6-hydroxypyrimidine                                                       |
| 7.7521      | 0.220       | 4(1H)-Pyrimidinone, 6-hydroxy-                                                        |
| 7.8174      | 0.170       | 2-Methylthiomethyl-4-(5-methylthiomethyl-2-tetrahydrothienyl)thietane                 |
| 8.0014      | 0.237       | Ethanamine, N-ethyl-N-nitroso-                                                        |
| 8.0548      | 0.216       | 4(1H)-Pyridinone, 2,3-dihydro-1-methyl-                                               |
| 8.1260      | 0.659       | 4H-Pyran-4-one, 2,3-dihydro-3,5-dihydroxy-6-methyl-                                   |
| 8.2981      | 1.014       | Semioxamazide                                                                         |
| 8.4109      | 0.317       | (2-Benzenesulfonylamino-4-methylthiazol-5-yl)carbamic acid 2-dimethylaminoethyl ester |
| 8.4822      | 0.263       | Aziridine, 2,2,3,3-tetramethyl-                                                       |
| 8.5653      | 0.332       | 2-Pyrrolidinecarboxamide, 5-oxo-, (S)-                                                |
| 8.6424      | 0.151       | Piperidine, 3-methyl-                                                                 |
| 8.6958      | 0.315       | 1-Nonanamine                                                                          |
| 8.7492      | 0.627       | Decane, 1-iodo-                                                                       |
| 9.0223      | 0.330       | 4-Acetamidobutyric acid                                                               |
| 9.2181      | 1.058       | 2-Propanone, dimethylhydrazone                                                        |
| 9.3072      | 0.625       | Heptanal                                                                              |
| 9.3962      | 0.405       | Deoxyspergualin                                                                       |
| 9.5505      | 0.227       | Valeraldehyde, dimethylhydrazone                                                      |
| 9.6277      | 1.309       | Benzeneacetic acid                                                                    |
| 9.7820      | 0.763       | 1-Propene, 3-methoxy-2-methyl-                                                        |
| 9.8770      | 0.424       | o-(iso-Pentyl) S-(2-diethylaminoethyl) ethylphosphonothiolate                         |
| 9.9600      | 0.348       | Isosorbide                                                                            |
| 10.0313     | 0.505       | Acetamide, N,N-bis(1-methylethyl)-                                                    |
| 10.2271     | 1.452       | Pentanal, 2-methylene-, 2-(1-methylethyl)hydrazone                                    |
| 10.3162     | 0.635       | 2,5-Diethylphenol                                                                     |

|         |        |                                                                                                          |
|---------|--------|----------------------------------------------------------------------------------------------------------|
| 10.4111 | 0.392  | 1,3,5-Triazine, hexahydro-1,3,5-trimethyl-                                                               |
| 10.5180 | 0.880  | Phenol, 3-methyl-5-(1-methylethyl)-, methylcarbamate                                                     |
| 10.5714 | 0.562  | 1H-Imidazole-4-methanol, 5-methyl-                                                                       |
| 10.6485 | 0.612  | 1,1'-Methylenebis(3-methylpiperidine)                                                                    |
| 10.7851 | 0.737  | Oxazolidine, 2-isopropyl-2-methyl-                                                                       |
| 10.8444 | 0.578  | 1,3:2,4-Di-O-methylene-dl-xylitol                                                                        |
| 10.9334 | 1.460  | Glycerol 1,2-diacetate                                                                                   |
| 11.0284 | 1.532  | Pyridine, 3-(1-methyl-2-pyrrolidinyl)-, (S)-                                                             |
| 11.3192 | 1.130  | L-Glutamic acid                                                                                          |
| 11.4320 | 0.766  | N-[4-Aminobutyl]aziridine                                                                                |
| 11.4914 | 1.024  | Propane, 2-(ethenyloxy)-                                                                                 |
| 11.6160 | 0.825  | Prilocaine                                                                                               |
| 11.7881 | 0.363  | Oxazolidine, 2-ethyl-2-methyl-                                                                           |
| 12.5182 | 7.908  | N1-(4-hydroxybutyl)-N3-methylguanidine acetate                                                           |
| 12.5478 | 1.315  | N1-(4-hydroxybutyl)-N3-methylguanidine acetate                                                           |
| 12.6606 | 10.512 | N1-(4-hydroxybutyl)-N3-methylguanidine acetate                                                           |
| 13.0167 | 1.516  | Thiourea, diethylaminomethyl                                                                             |
| 13.1414 | 0.464  | .beta.-D-Glucopyranose, 1,6-anhydro-                                                                     |
| 13.2838 | 0.664  | Piperazine                                                                                               |
| 13.4678 | 0.474  | Piperazine                                                                                               |
| 13.5272 | 0.436  | 2-Naphthalenamine                                                                                        |
| 13.7646 | 0.769  | Cyclododecane                                                                                            |
| 13.9248 | 0.756  | 3-Methyl-4-phenyl-1H-pyrrole                                                                             |
| 13.9723 | 0.296  | 4(1H)-Pyrimidinone, 6-hydroxy-                                                                           |
| 14.5362 | 2.509  | 2R,3S-9-[1,3,4-Trihydroxy-2-butoxymethyl]guanine                                                         |
| 14.6845 | 2.366  | 2R,3S-9-[1,3,4-Trihydroxy-2-butoxymethyl]guanine                                                         |
| 14.7498 | 2.417  | 2R,3S-9-[1,3,4-Trihydroxy-2-butoxymethyl]guanine                                                         |
| 14.8863 | 0.473  | 2R,3S-9-[1,3,4-Trihydroxy-2-butoxymethyl]guanine                                                         |
| 14.9398 | 1.015  | N-Methoxymethyl-N-methylacetamide                                                                        |
| 15.2899 | 1.793  | 2-(2-Hydroxyethyl)piperidine                                                                             |
| 15.3730 | 1.291  | 1-Aza-8-oxabicyclo[4.3.0]non-3-en-2-one, 5-hydroxy-9,9-dimethyl-                                         |
| 15.6105 | 0.407  | Pyrrolizin-1,7-dione-6-carboxylic acid, methyl(ester)                                                    |
| 15.6461 | 0.714  | Pterin-6-carboxylic acid                                                                                 |
| 15.9250 | 1.934  | Pyrrolo[1,2-a]pyrazine-1,4-dione, hexahydro-                                                             |
| 16.1387 | 0.828  | 3-Piperidinemethanol                                                                                     |
| 16.5126 | 1.222  | 1-Proline, N-allyloxycarbonyl-, heptadecyl ester                                                         |
| 16.7678 | 0.394  | 2-Hydroxy-3,5,5-trimethyl-cyclohex-2-enone                                                               |
| 17.1240 | 0.147  | 1,3-Benzenediol, 5-pentyl-                                                                               |
| 17.4979 | 0.545  | Phenol, 3,4-dimethoxy-                                                                                   |
| 17.5572 | 0.249  | Pyrrolo[1,2-a]pyrazine-1,4-dione, hexahydro-3-(2-methylpropyl)-                                          |
| 17.6641 | 0.744  | Pyrrolo[1,2-a]pyrazine-1,4-dione, hexahydro-3-(2-methylpropyl)-                                          |
| 17.7531 | 0.242  | 2,5-Cyclohexadien-1-one, 3,5-dihydroxy-4,4-dimethyl-                                                     |
| 17.7946 | 0.895  | 1,2-Cyclopentanedione, 3,3,5,5-tetramethyl-                                                              |
| 17.8777 | 0.566  | n-Hexadecanoic acid                                                                                      |
| 18.0736 | 0.163  | Acetamide, 2-(adamantan-1-yl)-N-(1-adamantan-1-ylethyl)-                                                 |
| 18.2101 | 0.336  | 9H-Pyrido[3,4-b]indole                                                                                   |
| 19.3022 | 0.136  | 1,3-Propanediamine, N,N'-bis(3-aminopropyl)-                                                             |
| 19.3972 | 0.114  | Thiazolo[4,5-f]quinoline, 7-methyl-                                                                      |
| 19.5574 | 0.377  | 9-Octadecenoic acid, (E)-                                                                                |
| 19.7533 | 0.338  | Octadecanoic acid                                                                                        |
| 20.0323 | 0.113  | Cyclohexanecarboxamide, N-(4-morpholylcarbonyl)-                                                         |
| 20.1272 | 0.239  | Terbutaline                                                                                              |
| 20.5071 | 0.171  | Formic acid, (2-fluoro-5-nitrophenyl)methyl ester                                                        |
| 20.7564 | 0.775  | 1-Piperidinyloxy, 4-amino-2,2,6,6-tetramethyl-                                                           |
| 21.3796 | 0.372  | Ergotaman-3',6',18-trione, 9,10-dihydro-12'-hydroxy-2'-methyl-5'-(phenylmethyl)-, (5'.alpha.,10.alpha.)- |
| 21.4805 | 0.173  | Butyl 9-tetradecenoate                                                                                   |

|         |       |                                                               |
|---------|-------|---------------------------------------------------------------|
| 21.7416 | 0.700 | Pyrrolo[1,2-a]pyrazine-1,4-dione, hexahydro-3-(phenylmethyl)- |
| 24.1751 | 0.214 | Formic acid, (4-fluoro-3-nitrophenyl)methyl ester             |
| 24.2523 | 0.281 | Benzene, 1-methoxy-3-(methylthio)-                            |
| 24.4956 | 0.654 | L-Proline, N-allyloxycarbonyl-, propyl ester                  |

**Table S2.** Chemical species identified by GC-MS in *S. rochei* DSM 41729 extract.

| RT<br>(min) | Area<br>(%) | Assignment                                                       |
|-------------|-------------|------------------------------------------------------------------|
| 3.2945      | 0.337       | 2-Propanol, 1-amino-                                             |
| 3.3657      | 0.459       | N,N-Dimethylaminoethanol                                         |
| 3.5734      | 0.361       | Ethyl 2,5,8,11,14-pentaoxahexadecan-16-oate                      |
| 3.6387      | 4.057       | 2,3-Butanediol, [R-(R*,R*)]-                                     |
| 3.7159      | 1.983       | 2,3-Butanediol, [R-(R*,R*)]-                                     |
| 4.0957      | 0.258       | Butanoic acid, 3-methyl-                                         |
| 4.1848      | 0.113       | Butanoic acid, 2-methyl-                                         |
| 4.3510      | 0.300       | 1-Heptene, 5-methyl-                                             |
| 4.4697      | 0.204       | 3-Pyridinamine, 2-methyl-                                        |
| 4.9801      | 0.385       | Butyrolactone                                                    |
| 5.0395      | 0.134       | Hydrazine, 1-methyl-1-(2-propynyl)-                              |
| 5.0988      | 0.196       | 3H-Pyrazol-3-one, 1,2-dihydro-5-methyl-                          |
| 5.3125      | 0.195       | 1,3-Butanediol, (S)-                                             |
| 5.6211      | 0.602       | Benzenebutanoic acid, 3,4-dimethyl-.gamma.-oxo-                  |
| 5.9535      | 3.590       | 1,1-Bis[aziridyl]trimethylamine]                                 |
| 6.0544      | 0.736       | Dimethylaminomethyl-isopropyl-sulfide                            |
| 6.1078      | 0.903       | N,N-Dimethylglycine                                              |
| 6.1969      | 1.553       | N,N-Dimethylglycine                                              |
| 6.3927      | 1.641       | N,N-Dimethylglycine                                              |
| 6.4817      | 3.237       | Benzeneacetaldehyde                                              |
| 6.5945      | 1.422       | Carbamic acid, 2-(dimethylamino)ethyl ester                      |
| 6.8675      | 0.397       | Oxirane, 2,3-diethyl-                                            |
| 6.9328      | 0.347       | Butanedioic acid, 2,3-bis[(dimethylamino)methyl]-, diethyl ester |
| 7.0575      | 0.654       | 2-Pyrrolidinone                                                  |
| 7.1109      | 0.194       | Butanenitrile, 4-(dimethylamino)-                                |
| 7.1643      | 0.205       | Butanenitrile, 4-(dimethylamino)-                                |
| 7.2237      | 0.234       | Inosine                                                          |
| 7.2593      | 0.211       | 1,3-Propanediamine, N,N,N',N'-tetramethyl-                       |
| 7.3127      | 0.202       | N-[3-[N-Aziridyl]propylidene]-3-dimethylaminopropylamine         |
| 7.3720      | 0.339       | But-3-enyl (E)-2-methylbut-2-enoate                              |
| 7.4314      | 0.350       | N,N-Dimethylacetamide                                            |
| 7.5916      | 0.146       | 1,2-Ethanediamine, N,N'-dimethyl-N-[2-(methylamino)ethyl]-       |
| 7.6985      | 0.391       | 4,5-Diamino-6-hydroxypyrimidine                                  |
| 7.8231      | 0.290       | Piperazine, 1-[2-(2,5-dimethyl-1H-pyrrol-1-yl)ethyl]-            |
| 8.0130      | 0.195       | Ethyldiethanolamine                                              |
| 8.0724      | 0.225       | 4(1H)-Pyridinone, 2,3-dihydro-1-methyl-                          |
| 8.1377      | 0.498       | 4H-Pyran-4-one, 2,3-dihydro-3,5-dihydroxy-6-methyl-              |
| 8.2920      | 0.856       | 2-Phenylpropenal                                                 |
| 8.4226      | 0.539       | Dehydromevalonic lactone                                         |
| 8.4998      | 0.349       | N,N-Dimethylacetoacetamide                                       |
| 8.5769      | 0.339       | N,N-Dimethylacetoacetamide                                       |
| 8.6837      | 0.310       | 2-Piperidinone                                                   |
| 8.7550      | 0.379       | Thiazole                                                         |
| 8.9805      | 0.215       | N-Methoxymethyl-N-methylacetamide                                |
| 9.0280      | 0.119       | 1,3-Dioxane-2-propanol, 2-methyl-                                |
| 9.0695      | 0.238       | 2-Propenal, 3-(dimethylamino)-3-ethoxy-                          |
| 9.1586      | 0.258       | Benzenemethanamine, N-methyl-                                    |
| 9.3129      | 0.405       | Pentanoic acid, 2,2-dimethyl-, methyl ester                      |

|         |       |                                                                                                                  |
|---------|-------|------------------------------------------------------------------------------------------------------------------|
| 9.3841  | 0.394 | 1H-Imidazole-4-carboxamide, 5-amino-2-methyl-                                                                    |
| 9.5503  | 0.229 | 5-Aminohexanoic acid                                                                                             |
| 9.6334  | 1.057 | Benzeneacetic acid                                                                                               |
| 9.7818  | 1.790 | dl-Mevalonic acid lactone                                                                                        |
| 9.9658  | 0.290 | 2-Propanamine, N-ethyl-                                                                                          |
| 10.0251 | 0.408 | Urea, N-tert-butyl-N',N'-dimethyl-                                                                               |
| 10.1379 | 0.291 | Deoxyspergualin                                                                                                  |
| 10.1913 | 0.214 | Isosorbide                                                                                                       |
| 10.2566 | 0.455 | Indolizine                                                                                                       |
| 10.3516 | 0.416 | Deoxyspergualin                                                                                                  |
| 10.4109 | 0.238 | 3-Hydroxy-N,N-dimethylpropanamide                                                                                |
| 10.4525 | 0.244 | Urea, N-tert-butyl-N',N'-dimethyl-                                                                               |
| 10.5118 | 0.495 | 3,4-Diethylphenol                                                                                                |
| 10.5712 | 0.513 | N,N-diacetyl-norpseudoephedrine                                                                                  |
| 10.6542 | 0.558 | 2-(Diethylamino)-N-(9,10-dioxoanthracene-2-yl)-ethanamide                                                        |
| 10.7848 | 1.220 | 3-Hydroxy-N,N-dimethylpropanamide                                                                                |
| 11.0223 | 1.241 | Isosorbide                                                                                                       |
| 11.1944 | 0.477 | D-Leucine                                                                                                        |
| 11.3249 | 1.508 | DL-Proline, 5-oxo-, methyl ester                                                                                 |
| 11.4793 | 0.740 | D-Leucine                                                                                                        |
| 11.5149 | 0.529 | Isosorbide                                                                                                       |
| 11.6514 | 1.121 | Leucine                                                                                                          |
| 11.6929 | 0.852 | 2,5-Diisopropylpiperazine                                                                                        |
| 11.7879 | 0.537 | 3-[N-[2-Diethylaminoethyl]-1-cyclohexenylamino]propyl nitrile                                                    |
| 11.8591 | 0.753 | D-Leucine                                                                                                        |
| 11.9660 | 1.089 | D-Leucine                                                                                                        |
| 12.0490 | 0.964 | D-Leucine                                                                                                        |
| 12.0906 | 0.290 | Leucine                                                                                                          |
| 12.1321 | 0.489 | D-Leucine                                                                                                        |
| 12.4171 | 4.866 | Di-[1,3,2]-oxazino[6,5-f:5',6'-H]quinoxaline, 2,3,4,5,6,7-hexahydro-3,6-bis[2-diethylaminoethyl]-10,11-diphenyl- |
| 12.4883 | 4.212 | Dianhydromannitol                                                                                                |
| 13.0284 | 0.291 | Piperazine, 2,5-dimethyl-                                                                                        |
| 13.0759 | 0.271 | Arginine                                                                                                         |
| 13.1412 | 0.744 | Ethyl isopropylamino oximinoacetate                                                                              |
| 13.5269 | 0.811 | Isoquinoline, 1-methyl-                                                                                          |
| 13.6457 | 0.399 | 4-Piperidinemethanol, 1-methyl-                                                                                  |
| 13.7584 | 0.583 | Cyclohexanone, 5-methyl-2-(1-methylethyl)-, cis-                                                                 |
| 13.8415 | 0.248 | 2-Butenal, dimethylhydrazone                                                                                     |
| 13.9246 | 0.481 | 3-Methyl-4-phenyl-1H-pyrrole                                                                                     |
| 13.9662 | 0.512 | 4-(4-Methylphenyl)pyridine                                                                                       |
| 14.3341 | 0.514 | Pyrazine, 2,5-dimethyl-3-propyl-                                                                                 |
| 14.5716 | 1.017 | 1H-1,3-Benzimidazole-1-acetonitrile, 2-(difluoromethyl)-                                                         |
| 14.6606 | 0.828 | 4-Methyl-2,7-dioxatricyclo[4.4.0.0(3,8)]decane                                                                   |
| 14.7378 | 0.538 | 2-Amino-3-cyano-5-aldoximinopyrazine-1-oxide                                                                     |
| 14.9336 | 0.410 | .alpha.-Pyrrolidone, 5-[3-hydroxybutyl]-                                                                         |
| 14.9870 | 0.467 | Isoglutamine                                                                                                     |
| 15.1117 | 0.418 | l-Pyrrolid-2-one, N-carboxyhydrazide                                                                             |
| 15.1770 | 1.527 | 2-Piperidinecarboxylic acid                                                                                      |
| 15.3847 | 1.371 | 3-Pyrrolidin-2-yl-propionic acid                                                                                 |
| 15.4797 | 0.387 | 5-Amino-7-hydroxytriazolo(1,5-a)-S-triazine                                                                      |
| 15.5390 | 0.329 | Benzenepropanoic acid, .alpha.-(1-aminoethyl)-, [R-(R*,R*)]-                                                     |
| 15.6399 | 0.826 | Pyridine, 3-(1-methyl-2-pyrrolidinyl)-, 1-oxide, (S)-                                                            |
| 15.8892 | 2.094 | Pyrrolo[1,2-a]pyrazine-1,4-dione, hexahydro-                                                                     |
| 16.0257 | 0.271 | L-Threonine, N-[(1H-purin-6-ylamino)carbonyl]-                                                                   |
| 16.1325 | 1.017 | Adenine                                                                                                          |
| 16.5302 | 3.181 | Pyrrolo[1,2-a]pyrazine-1,4-dione, hexahydro-3-(2-methylpropyl)-                                                  |

|         |       |                                                                                                                         |
|---------|-------|-------------------------------------------------------------------------------------------------------------------------|
| 16.7736 | 0.654 | Phenol, 3,5-dimethoxy-                                                                                                  |
| 16.8923 | 0.181 | Arginine                                                                                                                |
| 17.1297 | 0.213 | Imidazo[4,5-e]-1,4-diazepin-8-one, 1,4,5,6,7,8-hexahydro-1,4-dimethyl-                                                  |
| 17.2840 | 0.153 | 7,10-Epoxy-6H-azepino[1,2-e]purine-8,9-diol, 4-amino-7,8,9,10-tetrahydro-, [7R-(7.alpha.,8.alpha.,9.alpha.,10.alpha.)]- |
| 17.5036 | 1.663 | L-Leucine, N-cyclopropylcarbonyl-, hexadecyl ester                                                                      |
| 17.6045 | 0.257 | Phenol, 3,5-dimethoxy-                                                                                                  |
| 17.6757 | 2.376 | Pyrrolo[1,2-a]pyrazine-1,4-dione, hexahydro-3-(2-methylpropyl)-                                                         |
| 17.7529 | 0.521 | Pyrrolo[1,2-a]pyrazine-1,4-dione, hexahydro-3-(2-methylpropyl)-                                                         |
| 17.7944 | 0.751 | 5,10-Diethoxy-2,3,7,8-tetrahydro-1H,6H-dipyrrolo[1,2-a:1',2'-d]pyrazine                                                 |
| 17.8775 | 0.502 | n-Hexadecanoic acid                                                                                                     |
| 18.1209 | 0.101 | 2-Amino-4-nitrophenol, N,O-bis(methyl)-                                                                                 |
| 18.1862 | 0.313 | 9H-Pyrido[3,4-b]indole                                                                                                  |
| 18.3642 | 0.271 | Cyclododecanol, 1-ethenyl-                                                                                              |
| 18.5245 | 0.135 | N-8-Guanidino-spermidine                                                                                                |
| 18.5957 | 0.156 | Phenol, 2,3-dimethyl-                                                                                                   |
| 18.7322 | 0.105 | 2-(2-Hydroxyethylamino)-1,4-naphthoquinone                                                                              |
| 19.3198 | 0.211 | [2,7]Naphthyridine-1,3,6,8-tetraol                                                                                      |
| 19.4504 | 0.132 | Spiro[5.6]dodecane-1,7-dione                                                                                            |
| 19.7531 | 0.279 | Octadecanoic acid                                                                                                       |
| 20.0973 | 0.131 | Propionylfilicinic acid                                                                                                 |
| 20.5009 | 0.500 | Diethyldithiophosphinic acid                                                                                            |
| 20.6196 | 0.223 | 5-Isopropylidene-3,3-dimethyl-dihydrofuran-2-one                                                                        |
| 20.7383 | 0.836 | Hexamethylcyclohexane-1,3,5-trione                                                                                      |
| 21.2963 | 0.304 | [1-(4-Amino-furazan-3-yl)-5-methyl-1H-[1,2,3]triazol-4-yl]-pyrrolidin-1-yl-methanone                                    |
| 21.3734 | 0.896 | Pyrrolo[1,2-a]pyrazine-1,4-dione, hexahydro-3-(phenylmethyl)-                                                           |
| 21.7414 | 2.537 | Pyrrolo[1,2-a]pyrazine-1,4-dione, hexahydro-3-(phenylmethyl)-                                                           |
| 24.1986 | 1.683 | L-Norvaline, n-propargyloxycarbonyl-, tetradecyl ester                                                                  |
| 24.5013 | 1.981 | Sebacic acid, 2,6-dimethoxyphenyl octyl ester                                                                           |

**Table S3.** Incidence of *B. cinerea* on cv. 'Red Globe' and cv. 'Timpson' grapes after 1, 5, 10, and 15 days. The numbers represent the percentage of clusters having more than one berry infected with *B. cinerea*. Values are means  $\pm$  s.d. of 25 clusters with four replicates. Different letters represent significant differences by Tukey HSD test at  $P < 0.05$ .

| Time (days) | cv. 'Timpson'          |                          |                                                 |                                                | cv. 'Red Globe'        |                         |                                                 |                                                |
|-------------|------------------------|--------------------------|-------------------------------------------------|------------------------------------------------|------------------------|-------------------------|-------------------------------------------------|------------------------------------------------|
|             | Negative Control       | Positive Control         | COS-ML (1000 $\mu\text{g}\cdot\text{mL}^{-1}$ ) | COS-MR (750 $\mu\text{g}\cdot\text{mL}^{-1}$ ) | Negative Control       | Positive Control        | COS-ML (1000 $\mu\text{g}\cdot\text{mL}^{-1}$ ) | COS-MR (750 $\mu\text{g}\cdot\text{mL}^{-1}$ ) |
| 1           | 0 $\pm$ 0 <sup>a</sup> | 0 $\pm$ 0 <sup>a</sup>   | 0 $\pm$ 0 <sup>a</sup>                          | 0 $\pm$ 0 <sup>a</sup>                         | 0 $\pm$ 0 <sup>a</sup> | 0 $\pm$ 0 <sup>a</sup>  | 0 $\pm$ 0 <sup>a</sup>                          | 0 $\pm$ 0 <sup>a</sup>                         |
| 5           | 0 $\pm$ 0 <sup>a</sup> | 19 $\pm$ 2 <sup>b</sup>  | 0 $\pm$ 0 <sup>a</sup>                          | 0 $\pm$ 0 <sup>a</sup>                         | 0 $\pm$ 0 <sup>a</sup> | 0 $\pm$ 0 <sup>a</sup>  | 0 $\pm$ 0 <sup>a</sup>                          | 0 $\pm$ 0 <sup>a</sup>                         |
| 10          | 0 $\pm$ 0 <sup>a</sup> | 76 $\pm$ 4 <sup>c</sup>  | 0 $\pm$ 0 <sup>a</sup>                          | 0 $\pm$ 0 <sup>a</sup>                         | 0 $\pm$ 0 <sup>a</sup> | 33 $\pm$ 6 <sup>b</sup> | 15 $\pm$ 2 <sup>b</sup>                         | 0 $\pm$ 0 <sup>a</sup>                         |
| 15          | 0 $\pm$ 0 <sup>a</sup> | 100 $\pm$ 0 <sup>d</sup> | 0 $\pm$ 0 <sup>a</sup>                          | 0 $\pm$ 0 <sup>a</sup>                         | 0 $\pm$ 0 <sup>a</sup> | 80 $\pm$ 4 <sup>c</sup> | 20 $\pm$ 1 <sup>c</sup>                         | 0 $\pm$ 0 <sup>a</sup>                         |

COS-ML: chitosan oligomers-*S. lavendofoliae* DSM 40217 secondary metabolites of. COS-MR: chitosan oligomers-*S. rochei* DSM 41729 secondary metabolites.
